# Supplementary material for: Synthesis, structure and catalytic application of lead(ii) complexes in cyanosilylation reactions
Source: Royal Society of Chemistry journal article supplement (doi:10.1039/c4dt02316a), 2014-10-20
Supplement: c4dt02316a1.pdf [file c4dt02316a1.pdf]

## Supporting Information

### Synthesis, Structure and Catalytic Application of Lead(II) Complexes in Cyanosilylation Reaction

Anirban Karmakar, Susanta Hazra, M. Fátima C. Guedes da Silva and Armando J. L. Pombeiro\*

Centro de Química Estrutural, Instituto Superior Técnico, Universidade de Lisboa, Av. Rovisco Pais, 1049-001, Lisbon, Portugal. E-mail: [pombeiro@tecnico.ulisboa.pt](mailto:pombeiro@tecnico.ulisboa.pt)

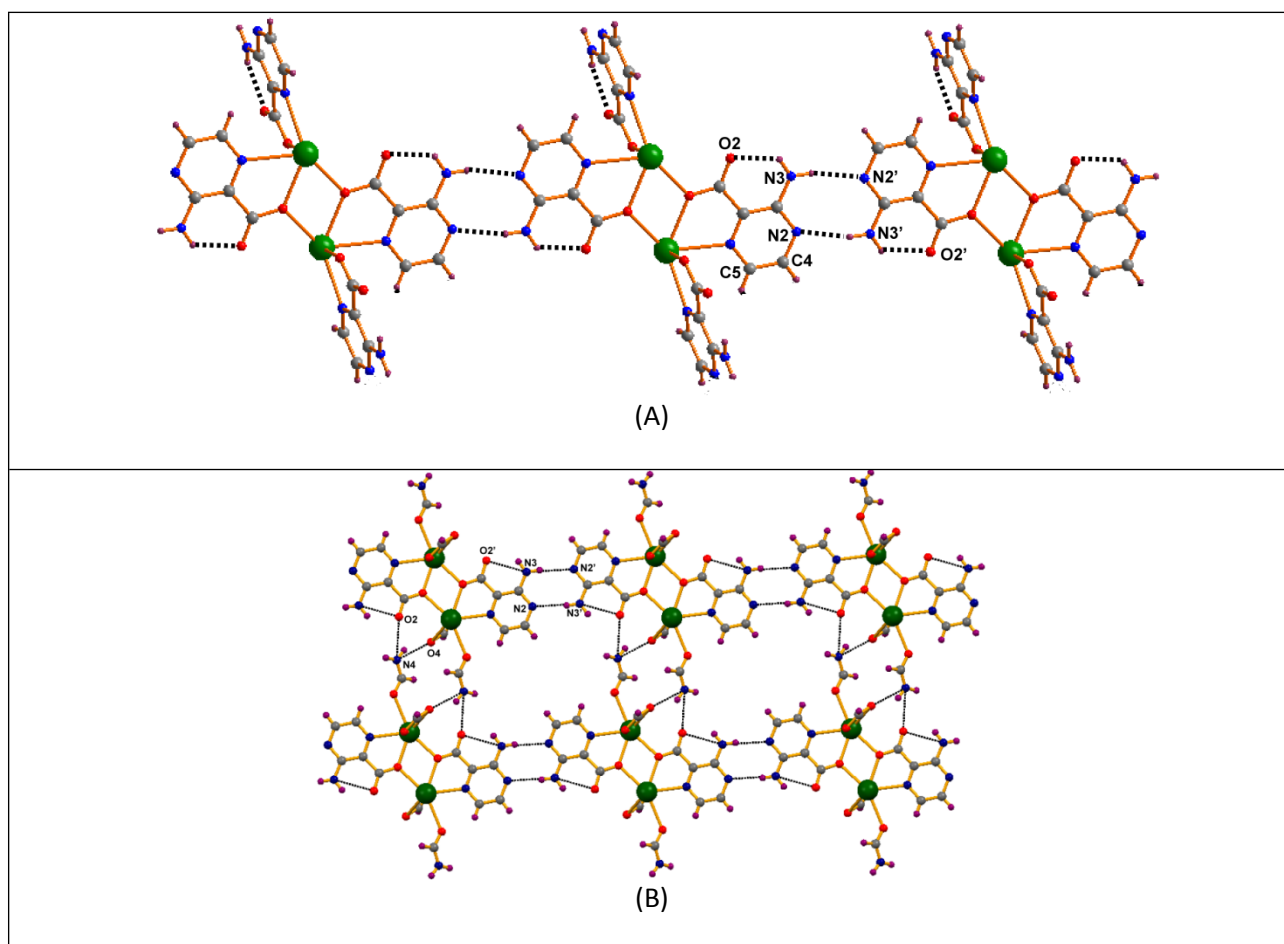

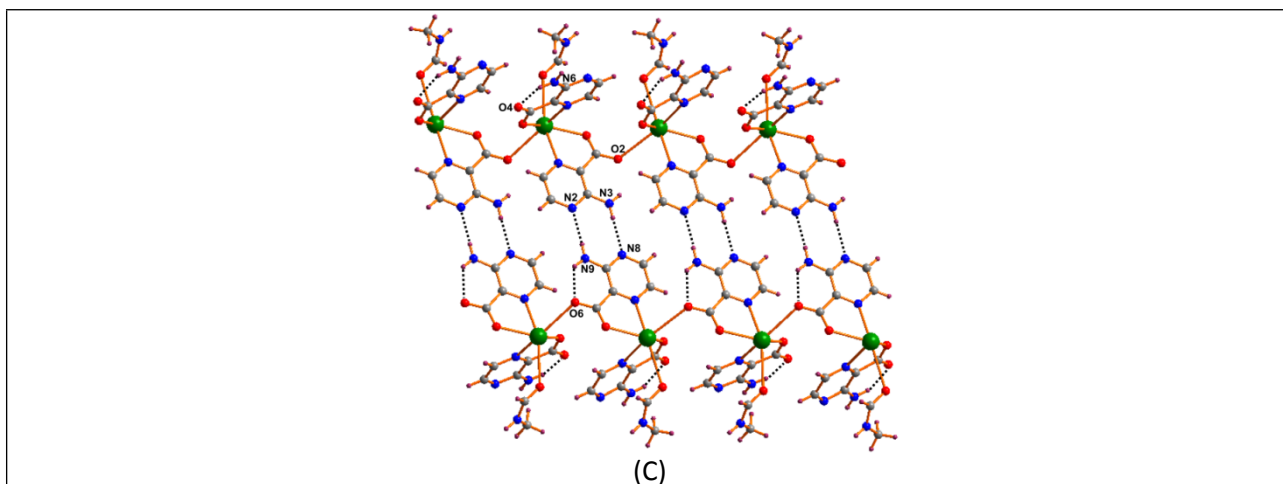

Fig. S1 Intra- and intermolecular H-bond interactions leading to infinite 1D chains in **1** (A), and 2D sheets in **2** (B) and **3** (C)

### Thermogravimetric analyses

Thermogravimetric analyses were carried out under dinitrogen in the range from room temperature to *ca.* 700 °C at a heating rate of 10 °C min<sup>-1</sup>. Features of the thermal stability of complexes **1-6** are illustrated in Fig. S2.

Complexes **1** and **3** show a single step decomposition, the former with a weight loss of 28.4% within 291-402 °C, most likely due to loss of two ligand molecules (calcd: 28.5%), whereas the latter shows a decrease of 23.2% of its weight within 286-381 °C due to the loss of two N-methylformamides and a L1 ligand (calcd: 23.6%).

Complex **2** shows two step decompositions and loses 5.5% of its weight within 112-156 °C, most likely due to loss of one formamide molecule (calcd: 5.1%). The residue remains stable up to about 190 °C and then starts to release another formamide molecule and two formate anions until 330 °C, which corresponds to a weight loss of 15.9 % (calcd. weight loss 16.3 %) and then gradually decomposes until 396 °C.

Complex **4** exhibits a weight loss of 16.8 % in the 122-301 °C temperature range, which accounts for the total removal of 2.5 molecules of dimethylformamide and a water molecule from the lattice (calcd: 17.1%). The remaining material then starts to decompose from 302 °C until 430 °C with loss of one ligand molecule which corresponds to a weight loss of 13.8% (calcd: 14.2%).

Complex **5** exhibits a weight loss of 7.3 % in the 212-281 °C temperature range, which accounts for the total removal of two dimethylformamide and a methanol molecules from the lattice (calcd: 7.6%). The remaining material then starts to decompose from 302 °C until 377 °C with loss of three ligand molecules, two formate and a nitrate molecule which corresponds to a weight loss of 25.8% (calcd: 26.2%).

Complex **6** shows a weight loss of 13.8% between 117 and 276°C, corresponding to the loss of two dimethylformamide molecules and a water molecule (calcd: 14.2%). Upon further heating, the complex is started to decompose from 277°C and gradually decomposes until 700°C.

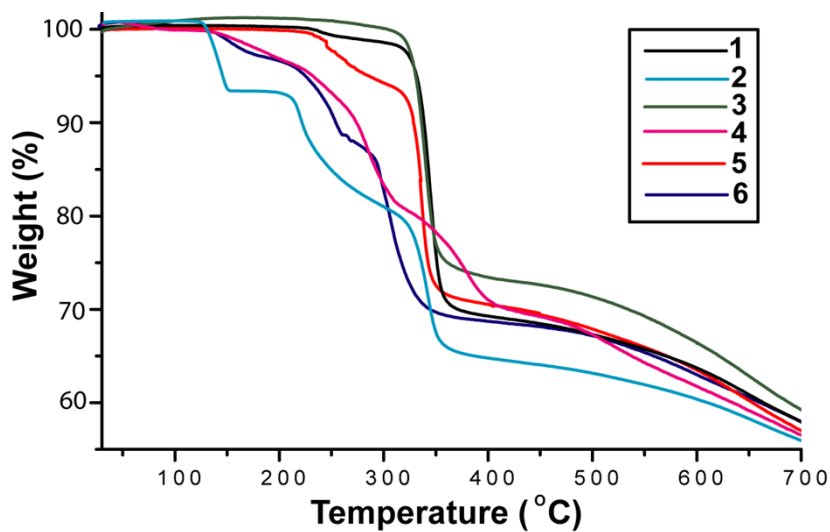

Fig. S2 Thermogravimetric curves for 1-6.

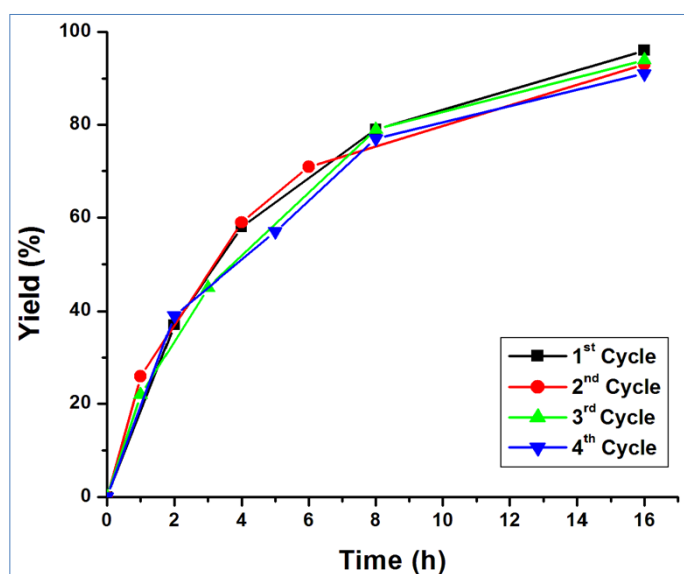

Fig. S3 Kinetic profiles in four consecutive reaction cycles employing complex **1** as catalyst in cyanosilylation reaction.

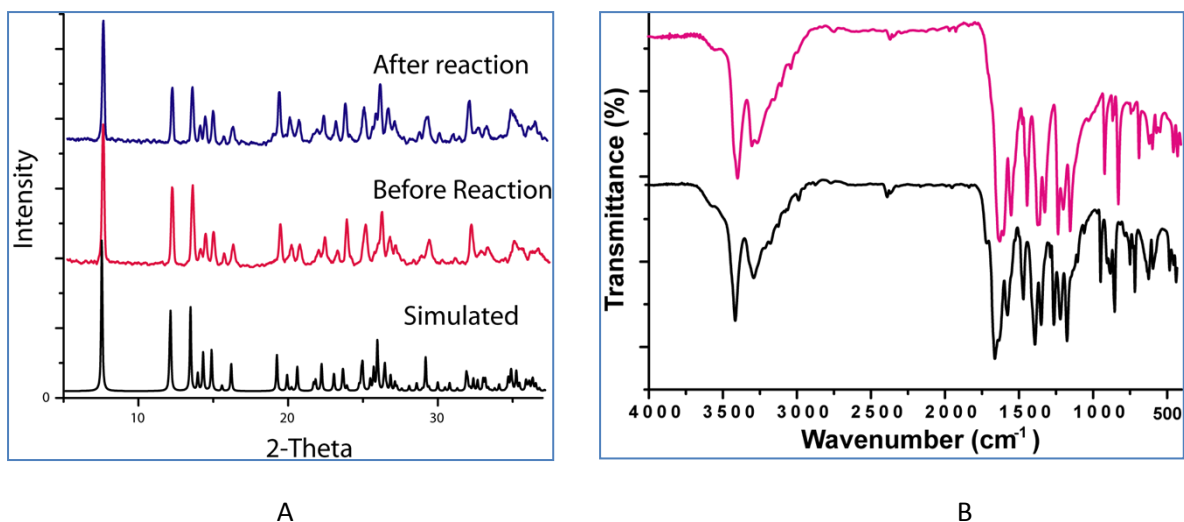

Fig. S4 A) Powder XRD curves of **1** (the red and blue curves refer to before and after the catalysis reaction and the black curve is the theoretical one). B) FT-IR spectra of **1** (the black and pink curves were obtained before and after the cyanosilylation reaction, respectively).

#### **Calculation of the yield in the Cyanosilylation reaction**

The -CH peak of benzaldehyde (reactant) appears as 10.048 ppm and the 2-phenyl-2-((trimethylsilyl)oxy)acetonitrile (product) appears at 5.531 ppm.

Total amount of complex: unreacted benzaldehyde + 2-phenyl-2-((trimethylsilyl)oxy)acetonitrile = 1 + 27.6 = 28.6

Percentage of the unreacted benzaldehyde:  $100/28.6 = 3.5\%$

Conversion of benzaldehyde = yield of 2-phenyl-2-((trimethylsilyl)oxy)acetonitrile =  $100 - 3.5 = 96.5\%$

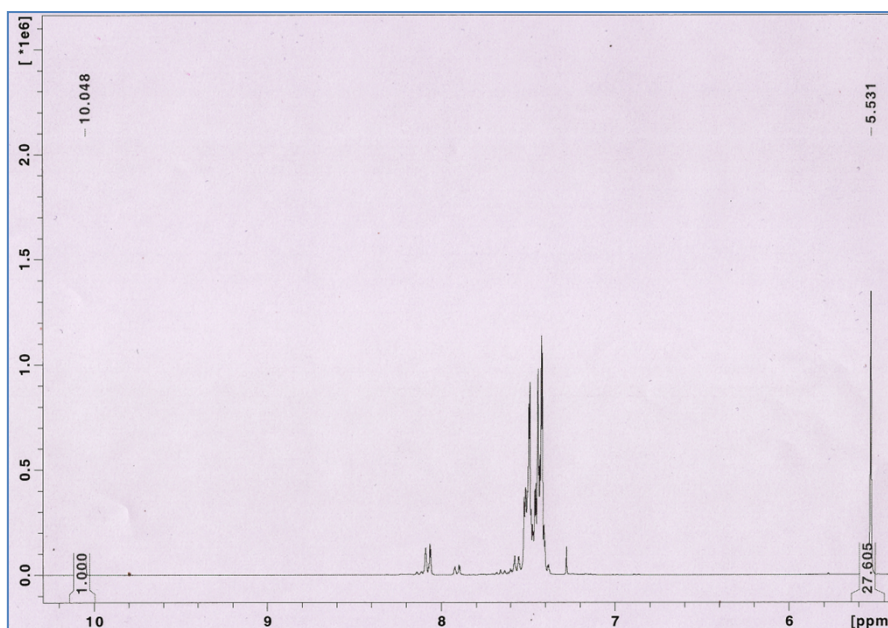

Fig. S5 Example of integration in the  $^1\text{H}$ -NMR spectrum for the determination of cyanosilylation reaction products (Table 1, Entry 4).

| Table S1: Crystal data and structure refinement details for Complexes 1-3 |                                                                |                                                                |                                                                   |
|---------------------------------------------------------------------------|----------------------------------------------------------------|----------------------------------------------------------------|-------------------------------------------------------------------|
| Identification name                                                       | 1                                                              | 2                                                              | 3                                                                 |
| Formulae                                                                  | $\text{C}_{20}\text{H}_{16}\text{N}_{12}\text{O}_8\text{Pb}_2$ | $\text{C}_{14}\text{H}_{16}\text{N}_8\text{O}_{10}\text{Pb}_2$ | $\text{C}_{24}\text{H}_{26}\text{N}_{14}\text{O}_{10}\text{Pb}_2$ |
| Mol. wt.                                                                  | 966.83                                                         | 870.73                                                         | 1084.97                                                           |
| Crystal system                                                            | Triclinic                                                      | Triclinic                                                      | Triclinic                                                         |
| Space group                                                               | P-1                                                            | P-1                                                            | P-1                                                               |
| Temperature /K                                                            | 296                                                            | 296                                                            | 296                                                               |
| Wavelength / $\text{\AA}$                                                 | 0.71073                                                        | 0.71073                                                        | 0.71073                                                           |
| $a$ / $\text{\AA}$                                                        | 7.7520(3)                                                      | 7.6846(4)                                                      | 7.6487(5)                                                         |
| $b$ / $\text{\AA}$                                                        | 7.8081(3)                                                      | 8.0250(4)                                                      | 12.2700(7)                                                        |
| $c$ / $\text{\AA}$                                                        | 11.2756(5)                                                     | 10.1201(5)                                                     | 18.3447(12)                                                       |
| $\alpha$ / $^\circ$                                                       | 85.184(2)                                                      | 102.495(2)                                                     | 81.365(2)                                                         |
| $\beta$ / $^\circ$                                                        | 86.853(2)                                                      | 99.181(2)                                                      | 87.259(2)                                                         |
| $\gamma$ / $^\circ$                                                       | 67.1140(10)                                                    | 112.272(2)                                                     | 73.959(2)                                                         |
| $V$ / $\text{\AA}^3$                                                      | 626.36(4)                                                      | 543.33(5)                                                      | 1635.82(18)                                                       |
| Z                                                                         | 1                                                              | 1                                                              | 2                                                                 |
| Density/ $\text{Mgm}^{-3}$                                                | 2.563                                                          | 2.661                                                          | 2.203                                                             |
| Abs. Coeff. / $\text{mm}^{-1}$                                            | 13.496                                                         | 15.544                                                         | 10.355                                                            |
| F(000)                                                                    | 448                                                            | 400                                                            | 1024                                                              |
| Refl. collected                                                           | 7136                                                           | 10973                                                          | 18025                                                             |
| Refl. unique                                                              | 2550                                                           | 2225                                                           | 5514                                                              |
| Max. $2\theta$ / $^\circ$                                                 | 26.37                                                          | 26.41                                                          | 24.70                                                             |
| Ranges (h, k, l)                                                          | -9 $\leq$ h $\leq$ 9<br>-9 $\leq$ k $\leq$ 9                   | -9 $\leq$ h $\leq$ 9<br>-10 $\leq$ k $\leq$ 10                 | -8 $\leq$ h $\leq$ 8<br>-13 $\leq$ k $\leq$ 14                    |

|                             | -14 ≤ l ≤ 14 | -12 ≤ l ≤ 12  | -21 ≤ l ≤ 21   |
|-----------------------------|--------------|---------------|----------------|
| Complete to 2θ (%)          | 99.5         | 99.9          | 99.2           |
| Refl. with I > 2σ(I)        | 2475         | 2167          | 4373           |
| Data/ Restraints/Parameters | 2550/ 0/ 190 | 2225 / 0/ 154 | 5514 / 0 / 453 |
| Goof (F <sup>2</sup> )      | 1.166        | 1.190         | 1.141          |
| R1 [I > 2s(I)]              | 0.0214       | 0.0187        | 0.0384         |
| wR2 [I > 2s(I)]             | 0.0540       | 0.0458        | 0.1015         |
| R1 [all data]               | 0.0220       | 0.0192        | 0.0504         |
| wR2 [all data]              | 0.0544       | 0.0462        | 0.1102         |

**Table S1: Crystal data and structure refinement details for Complexes 4-6**

| Identification name           | 4                                                                                       | 5                                                                               | 6                                                                               |
|-------------------------------|-----------------------------------------------------------------------------------------|---------------------------------------------------------------------------------|---------------------------------------------------------------------------------|
| Formulae                      | C <sub>27.5</sub> H <sub>35.5</sub> N <sub>14.5</sub> O <sub>11.5</sub> Pb <sub>2</sub> | C <sub>44</sub> H <sub>48</sub> N <sub>24</sub> O <sub>24</sub> Pb <sub>5</sub> | C <sub>28</sub> H <sub>32</sub> N <sub>14</sub> O <sub>11</sub> Pb <sub>2</sub> |
| Mol. wt.                      | 1167.58                                                                                 | 2333.01                                                                         | 1155.05                                                                         |
| Crystal system                | Monoclinic                                                                              | Monoclinic                                                                      | Monoclinic                                                                      |
| Space group                   | P2(1)/c                                                                                 | C2/m                                                                            | P2 <sub>1</sub> /c                                                              |
| Temperature /K                | 296                                                                                     | 296                                                                             | 296                                                                             |
| Wavelength /Å                 | 0.71073                                                                                 | 0.71073                                                                         | 0.71073                                                                         |
| a /Å                          | 14.468(3)                                                                               | 28.1919(17)                                                                     | 7.8443(4)                                                                       |
| b /Å                          | 13.261(2)                                                                               | 19.7200(10)                                                                     | 22.1845(13)                                                                     |
| c /Å                          | 19.861(4)                                                                               | 11.8904(8)                                                                      | 21.7657(13)                                                                     |
| α/°                           | 90.00                                                                                   | 90.00                                                                           | 90.00                                                                           |
| β/°                           | 90.964(7)                                                                               | 111.140(2)                                                                      | 90.842(2)                                                                       |
| γ/°                           | 90.00                                                                                   | 90.00                                                                           | 90.00                                                                           |
| V/ Å <sup>3</sup>             | 3809.9(12)                                                                              | 6165.5(6)                                                                       | 3787.3(4)                                                                       |
| Z                             | 4                                                                                       | 4                                                                               | 4                                                                               |
| Density/Mgm <sup>-3</sup>     | 2.036                                                                                   | 2.513                                                                           | 2.026                                                                           |
| Abs. Coeff. /mm <sup>-1</sup> | 8.903                                                                                   | 13.708                                                                          | 8.953                                                                           |
| F(000)                        | 2232                                                                                    | 4328                                                                            | 2200                                                                            |
| Refl. collected               | 66637                                                                                   | 46755                                                                           | 43363                                                                           |
| Refl. unique                  | 7794                                                                                    | 5832                                                                            | 6930                                                                            |
| Max. 2θ/°                     | 26.37                                                                                   | 25.41                                                                           | 25.36                                                                           |
| Ranges (h, k, l)              | -18 ≤ h ≤ 18<br>-16 ≤ k ≤ 16<br>-24 ≤ l ≤ 24                                            | -33 ≤ h ≤ 33<br>-23 ≤ k ≤ 23<br>-14 ≤ l ≤ 14                                    | -9 ≤ h ≤ 9<br>-26 ≤ k ≤ 26<br>-26 ≤ l ≤ 26                                      |
| Complete to 2θ (%)            | 99.9                                                                                    | 99.4                                                                            | 99.6                                                                            |
| Refl. with I > 2σ(I)          | 6291                                                                                    | 4847                                                                            | 4943                                                                            |
| Data/ Restraints/Parameters   | 7794 / 1 / 388                                                                          | 5832 / 24 / 412                                                                 | 6930 / 0 / 397                                                                  |
| Goof (F <sup>2</sup> )        | 1.058                                                                                   | 1.060                                                                           | 1.047                                                                           |
| R1 [I > 2s(I)]                | 0.0429                                                                                  | 0.0626                                                                          | 0.0526                                                                          |
| wR2 [I > 2s(I)]               | 0.1037                                                                                  | 0.1732                                                                          | 0.1172                                                                          |
| R1 [all data]                 | 0.0573                                                                                  | 0.0728                                                                          | 0.0862                                                                          |
| wR2 [all data]                | 0.1095                                                                                  | 0.1793                                                                          | 0.1269                                                                          |

**Table S2: Hydrogen bond geometry (Å, °) in complexes 1-6.**

| Complex             | D-H...A               | D-H (Å) | H...A (Å) | D...A (Å) | <D-H...A(°) | Symmetry         |
|---------------------|-----------------------|---------|-----------|-----------|-------------|------------------|
| <b>1</b>            | N(3)-H(3A)····N(2)    | 0.86    | 2.22      | 3.067(5)  | 167         | -1-x,1-y,-z      |
|                     | N(3)-H(3B)····O(2)    | 0.86    | 2.10      | 2.731(5)  | 130         | -                |
|                     | N(6)-H(6A)····O(2)    | 0.86    | 2.22      | 3.078(6)  | 174         | x,y,1+z          |
|                     | N(6)-H(6B)····O(4)    | 0.86    | 2.08      | 2.716(6)  | 130         | -                |
|                     | C(4)-(4)····N(5)      | 0.93    | 2.61      | 3.236(6)  | 125         | -x,1-y,1-z       |
|                     | C(10)-(10)····O(4)    | 0.93    | 2.44      | 3.147(5)  | 132         | x,1+y,z          |
| <b>2</b>            | N(3)-H(3A)····N(2)    | 0.86    | 2.24      | 3.093(4)  | 173         | 2-x,1-y,-z       |
|                     | N(3)-H(3B)····O(2)    | 0.86    | 2.09      | 2.721(4)  | 130         | -                |
|                     | N(4)-H(4A)····O(3)    | 0.86    | 2.21      | 3.063(5)  | 173         | -x+1, -y+1, -z+1 |
|                     | N(4)-H(4B)····O(2)    | 0.86    | 2.28      | 2.850(5)  | 124         | x, y+1, z+1      |
|                     | N(4)-H(4B)····O(4)    | 0.86    | 2.28      | 3.016(6)  | 144         | -x, -y+1, -z+1   |
|                     | C(3)-H(3)····O(5)     | 0.93    | 2.35      | 3.047(6)  | 132         | -                |
| <b>3</b>            | N(3)-H(3A)····N(8)    | 0.86    | 2.22      | 3.082(9)  | 177         | 1-x,1-y,-z       |
|                     | N(3)-H(3B)····O(2)    | 0.86    | 2.10      | 2.728(9)  | 129         | -                |
|                     | N(6)-H(6A)····N(11)   | 0.86    | 2.33      | 3.181(11) | 170         | 1-x,2-y,1-z      |
|                     | N(6)-H(6B)····O(4)    | 0.86    | 2.05      | 2.679(11) | 130         | -                |
|                     | N(14)-H(14A)····O(4)  | 0.86    | 2.01      | 2.806(11) | 154         | x,1+y,z          |
|                     | N(9)-H(9A)····N(2)    | 0.86    | 2.18      | 3.033(9)  | 175         | 1-x,1-y,-z       |
|                     | N(9)-H(9B)····O(6)    | 0.86    | 2.11      | 2.727(9)  | 128         | -                |
|                     | N(9)-H(9B)····O(6)'   | 0.86    | 2.32      | 2.953(8)  | 130         | 2-x,1-y,-z       |
|                     | N(12)-H(12A)····N(5)  | 0.86    | 2.14      | 2.970(11) | 163         | 1-x,2-y,1-z      |
|                     | N(12)-H(12B)····O(8)  | 0.86    | 2.03      | 2.673(10) | 131         | -                |
|                     | N(12)-H(12B)····O(8)' | 0.86    | 2.00      | 2.839(10) | 165         | 1+x,y,z          |
|                     | C(4)-H(4)····O(5)     | 0.93    | 2.40      | 3.322(8)  | 171         | -1+x,y,z         |
| C(14)-H(14)····O(1) | 0.93                  | 2.46    | 3.374(9)  | 169       | x,-1+y,z    |                  |
| <b>4</b>            | N(3)-H(3A)····N(11)   | 0.86    | 2.36      | 3.210(13) | 172         | 1+x,y,z          |
|                     | N(3)-H(3B)····O(2)    | 0.86    | 2.11      | 2.731(12) | 129         | -                |
|                     | N(6)-H(6A)····O(6)    | 0.86    | 1.96      | 2.806(8)  | 169         | x,1/2-y,1/2+z    |
|                     | N(6)-H(6B)····O(4)    | 0.86    | 2.03      | 2.668(8)  | 131         | -                |
|                     | N(9)-H(9A)····O(8)    | 0.86    | 2.20      | 2.954(9)  | 147         | -x,1-y,-z        |
|                     | N(9)-H(9B)····O(6)    | 0.86    | 2.06      | 2.689(9)  | 130         | -                |
|                     | O(9)-H(9O)····O(2)    | 0.91    | 1.94      | 2.830(9)  | 165         | 1-x,1/2+y,1/2-z  |
|                     | O(9)-H(10O)····O(8)   | 1.10    | 1.78      | 2.822(9)  | 156         | 1+x,y,z          |
|                     | O(9)-H(10O)····N(9)   | 1.10    | 2.52      | 3.200(9)  | 119         | 1-x,1-y,-z       |
|                     | N(12)-H(12A)····N(2)  | 0.86    | 2.12      | 2.978(13) | 174         | -1+x,y,z         |
|                     | N(12)-H(12B)····O(8)  | 0.86    | 2.04      | 2.677(12) | 130         | -                |
|                     | C(9)-H(9)····O(1)     | 0.93    | 2.54      | 3.281(9)  | 137         | x,1/2-y,1/2+z    |
|                     | C(14)-H(14)····O(2)   | 0.93    | 2.41      | 3.205(11) | 143         | x,1+y,z          |
| <b>5</b>            | N(3)-H(3A)····O(4)    | 0.86    | 2.49      | 3.33(2)   | 166         | 1/2-x,1/2-y,1-z  |
|                     | N(3)-H(3B)····O(2)    | 0.86    | 2.05      | 2.67(2)   | 129         | -                |
|                     | N(6)-H(6A)····N(8)    | 0.86    | 2.22      | 3.077(16) | 174         | 1/2+x,1/2-y,z    |
|                     | N(6)-H(6B)····O(4)    | 0.86    | 2.05      | 2.673(16) | 128         | -                |
|                     | N(9)-H(9A)····N(5)    | 0.86    | 2.31      | 3.150(15) | 166         | -1/2+x,1/2-y,z   |
|                     | N(9)-H(9B)····O(6)    | 0.86    | 2.03      | 2.666(16) | 130         | -                |
|                     | N(12)-H(12A)····O(11) | 0.86    | 2.52      | 3.37(5)   | 170         | x,y,1+z          |
|                     | N(12)-H(12A)····O(12) | 0.86    | 2.12      | 2.80(4)   | 136         | x,y,1+z          |
|                     | N(12)-H(12B)····O(8)  | 0.86    | 2.03      | 2.63(6)   | 126         | -                |
|                     | C(9)-H(9)····O(11)    | 0.93    | 2.60      | 3.310(17) | 133         | 1/2-x,1/2+y,-z   |

|                   |                       |      |           |           |           |                  |
|-------------------|-----------------------|------|-----------|-----------|-----------|------------------|
|                   | C(18)-H(18)····O(10)  | 0.93 | 2.62      | 3.55(4)   | 179       | -                |
|                   | C(8)-H(8)····O(1)     | 0.93 | 2.57      | 3.164(16) | 122       | -                |
| <b>6</b>          | N(3)-H(3N)····O(2)    | 0.86 | 1.94      | 2.627(16) | 135       | -                |
|                   | N(4)-H(4N)····O(4)    | 0.86 | 2.00      | 2.655(16) | 132       | -                |
|                   | N(9)-H(9N)····O(6)    | 0.86 | 2.03      | 2.673(12) | 131       | -                |
|                   | N(10)-H(10N)····O(8)  | 0.86 | 2.05      | 2.673(11) | 129       | -                |
|                   | C(17)-H(17A)····N(12) | 0.97 | 2.65      | 3.431(13) | 138       | -x+1, -y+2, -z+1 |
|                   | C(17)-H(17B)····N(8)  | 0.97 | 2.68      | 3.472(14) | 139       | -x+2, -y+2, -z+1 |
|                   | C(20)-H(20)····O(8)   | 0.93 | 2.48      | 3.222(13) | 136       | x-1, y, z        |
|                   | C(14)-H(14)····O(6)   | 0.93 | 2.55      | 3.286(13) | 137       | x+1, y, z        |
|                   | C(3)-H(3)····O(2)     | 0.93 | 2.40      | 3.203(14) | 145       | x+1, y, z        |
| C(9)-H(9)····O(4) | 0.93                  | 2.46 | 3.217(14) | 139       | x-1, y, z |                  |

**Table S3: Selected bond distances (Å) and angles (°) for complexes 1-6**

|          | Bond distances |            | Bond angles |            | Bond angles |
|----------|----------------|------------|-------------|------------|-------------|
| <b>1</b> |                |            |             |            |             |
| Pb1-O3   | 2.271(3)       | O3-Pb1-O1  | 84.05(11)   | O3-Pb1-N1  | 82.31(11)   |
| Pb1-O1   | 2.403(3)       | O3-Pb1-O1  | 81.26(11)   | O1-Pb1-N1  | 64.12(9)    |
| Pb1-O1'  | 2.531(3)       | O1-Pb1-O1  | 66.26(11)   | O1-Pb1-N1  | 128.90(9)   |
| Pb1-N4   | 2.585(3)       | O3-Pb1-N4  | 67.29(11)   | N4-Pb1-N1  | 78.62(11)   |
| Pb1-N1   | 2.608(3)       | O1-Pb1-N4  | 135.70(11)  | Pb1-O1-Pb1 | 113.74(11)  |
|          |                | O1-Pb1-N4  | 135.42(11)  |            |             |
| <b>2</b> |                |            |             |            |             |
| Pb1-O3   | 2.335(3)       | O3-Pb1-O1  | 84.03(10)   | O1-Pb1-N1  | 127.78(8)   |
| Pb1-O1   | 2.415(2)       | O3-Pb1-O1' | 86.68(10)   | O3-Pb1-O5  | 84.13(15)   |
| Pb1'-O1  | 2.555(2)       | O1-Pb1-O1' | 65.25(9)    | O1-Pb1-O5  | 138.76(11)  |
| Pb1-N1   | 2.613(3)       | O3-Pb1-N1  | 76.68(10)   | O1-Pb1-O5  | 152.58(11)  |
| Pb1-O5   | 2.686(4)       | O1-Pb1-N1  | 64.03(9)    | N1-Pb1-O5  | 74.82(11)   |
|          |                | Pb1-O1-Pb1 | 114.75(9)   |            |             |
| <b>3</b> |                |            |             |            |             |
| Pb1-O1   | 2.454(5)       | O3-Pb1-O1  | 130.4(2)    | O7-Pb2-N10 | 67.1(2)     |
| Pb1-O3   | 2.387(6)       | O3-Pb1-N1  | 79.5(2)     | O5-Pb2-N10 | 73.1(2)     |
| Pb1-N4   | 2.487(6)       | O1-Pb1-N1  | 65.72(18)   | N7-Pb2-N10 | 92.9(2)     |
| Pb1-N1   | 2.481(6)       | O3-Pb1-N4  | 66.9(2)     |            |             |
| Pb2-O5   | 2.443(5)       | O1-Pb1-N4  | 75.4(2)     |            |             |
| Pb2-O7   | 2.338(5)       | N1-Pb1-N4  | 84.8(2)     |            |             |
| Pb2-N10  | 2.501(6)       | O7-Pb2-O5  | 122.9(2)    |            |             |
| Pb2-N7   | 2.477(6)       | O7-Pb2-N7  | 77.0(2)     |            |             |
| Pb1-O9   | 2.855(1)       | O5-Pb2-N7  | 65.60(17)   |            |             |
| Pb2-O10  | 2.880(9)       |            |             |            |             |
| <b>4</b> |                |            |             |            |             |
| Pb1-O1   | 2.444(5)       | O1-Pb1-O3  | 90.70(16)   | O5-Pb2-N10 | 79.2(2)     |
| Pb1-O3   | 2.454(4)       | O1-Pb1-N1  | 64.9(2)     | O7-Pb2-O3  | 139.59(17)  |
| Pb1-N1   | 2.519(7)       | O3-Pb1-N1  | 85.24(19)   | O5-Pb2-O3  | 62.23(15)   |
| Pb1-O5   | 2.530(5)       | O1-Pb1-O5  | 139.26(18)  | N10-Pb2-O3 | 83.50(18)   |
| Pb2-O7   | 2.469(5)       | O3-Pb1-O5  | 65.50(16)   | O7-Pb2-N4  | 85.16(19)   |
| Pb2-O5   | 2.536(5)       | N1-Pb1-O5  | 79.9(2)     | O5-Pb2-N4  | 117.15(18)  |



|          |           |            |            |             |            |
|----------|-----------|------------|------------|-------------|------------|
| Pb2-N10  | 2.539(6)  | O7-Pb2-O5  | 128.80(19) | O3-Pb2-N4   | 60.33(16)  |
| Pb2-O3   | 2.677(5)  | O7-Pb2-N10 | 64.67(19)  | Pb1-O5-Pb2  | 109.89(19) |
| Pb2-N4   | 2.688(6)  | N10-Pb2-N4 | 71.2(2)    | Pb1-O3-Pb2  | 107.77(16) |
| <b>5</b> |           |            |            |             |            |
| Pb1-N1   | 2.436(12) | N1-Pb1-O1  | 66.2(4)    | O11-Pb3-O9  | 76.0(5)    |
| Pb1-O1   | 2.477(10) | N1-Pb1-O3  | 82.9(4)    | O4-Pb3-O9   | 106.3(4)   |
| Pb1-O3   | 2.481(10) | O1-Pb1-O3  | 131.0(3)   | O4-Pb3-O9'  | 148.2(5)   |
| Pb1-O5   | 2.584(10) | N1-Pb1-O5  | 78.8(4)    | O9-Pb3-O9   | 45.0(6)    |
| Pb1-N4   | 2.711(10) | O1-Pb1-O5  | 127.4(3)   | O7-Pb2-O6   | 118.7(4)   |
| Pb2-O7   | 2.360(18) | O3-Pb1-O5  | 78.0(3)    | O6-Pb2-O6'  | 92.4(5)    |
| Pb2-O6   | 2.479(11) | N1-Pb1-N4  | 79.5(4)    | O7-Pb2-N10  | 67.5(8)    |
| Pb2-N10  | 2.56(2)   | O1-Pb1-N4  | 74.9(3)    | O6-Pb2-N10  | 74.0(5)    |
| Pb2-O5   | 2.750(10) | O3-Pb1-N4  | 62.4(3)    | O7-Pb2-O5   | 80.5(2)    |
| Pb1-N7   | 2.793(10) | O5-Pb1-N4  | 136.6(3)   | O6-Pb2-O5   | 49.4(3)    |
| Pb3-O7   | 2.44(2)   | N1-Pb1-N7  | 74.8(4)    | O6-Pb2-O5   | 140.4(3)   |
| Pb3-O4   | 2.567(11) | O1-Pb1-N7  | 73.5(3)    | N10-Pb2-O5  | 84.4(3)    |
| Pb3-O11  | 2.58(2)   | O3-Pb1-N7  | 135.0(3)   | O7-Pb2-O5   | 80.5(2)    |
| Pb3-O9   | 2.729(16) | O5-Pb1-N7  | 59.8(3)    | O6-Pb2-O5   | 140.5(3)   |
| Pb4-O12  | 2.22(2)   | N4-Pb1-N7  | 145.2(4)   | O6-Pb2-O5   | 49.4(3)    |
| Pb4-O2   | 2.504(13) | O7-Pb3-O4  | 108.3(4)   | O5-Pb2-O5'  | 160.6(4)   |
|          |           | O4-Pb3-O4  | 96.1(5)    | O12-Pb4-O2  | 79.3(6)    |
|          |           | O7-Pb3-O11 | 160.4(6)   | O2-Pb4-O2'  | 76.4(6)    |
|          |           | O4-Pb3-O11 | 84.3(4)    | O12-Pb4-O13 | 83.8(7)    |
|          |           | O7-Pb3-O9  | 85.9(6)    | O2-Pb4-O13  | 156.3(6)   |
|          |           | O4-Pb3-O9  | 148.2(5)   | O2-Pb4-O13  | 116.5(5)   |
|          |           | O4-Pb3-O9  | 106.3(4)   | Pb1-O5-Pb2  | 141.7(4)   |
|          |           | O11-Pb3-O9 | 76.0(5)    | Pb2-O7-Pb3  | 112.5(9)   |
|          |           | O7-Pb3-O9  | 85.9(6)    |             |            |
| <b>6</b> |           |            |            |             |            |
| Pb1-O7   | 2.456(6)  | O7-Pb1-O1  | 132.7(2)   | O5-Pb2-O3   | 133.4(3)   |
| Pb1-O1   | 2.485(8)  | O7-Pb1-O3  | 73.5(2)    | O5-Pb2-O1   | 73.8(3)    |
| Pb1-O3   | 2.534(7)  | O1-Pb1-O3  | 120.6(3)   | O3-Pb2-O1   | 120.3(3)   |
| Pb1-N1   | 2.570(9)  | O7-Pb1-N1  | 79.3(3)    | O5-Pb2-N5   | 80.5(3)    |
| Pb1-N11  | 2.634(8)  | O1-Pb1-N1  | 64.0(3)    | O3-Pb2-N5   | 63.2(3)    |
| Pb2-O5   | 2.459(7)  | O3-Pb1-N1  | 75.8(3)    | O1-Pb2-N5   | 76.5(3)    |
| Pb2-O3   | 2.465(7)  | O7-Pb1-N11 | 63.7(2)    | O5-Pb2-N7   | 63.3(2)    |
| Pb2-O1   | 2.528(7)  | O1-Pb1-N11 | 78.3(3)    | O3-Pb2-N7   | 78.9(2)    |
| Pb2-N5   | 2.595(9)  | O3-Pb1-N11 | 131.7(2)   | O1-Pb2-N7   | 131.2(3)   |
| Pb2-N7   | 2.635(9)  | N1-Pb1-N11 | 75.2(3)    | N5-Pb2-N7   | 74.6(3)    |
